# Supplementary material for: Identification of Hub Genes and Construction of a Transcriptional Regulatory Network Associated With Tumor Recurrence in Colorectal Cancer by Weighted Gene Co-expression Network Analysis
Source: Front Genet. 2021 Apr 7;12:649752. doi: 10.3389/fgene.2021.649752 (PMC8058478; doi:10.3389/fgene.2021.649752)
Supplement: Supplementary file 3 [file Data_Sheet_2.XLSX]

## Sheet: GSE17536.clinical_data
	stage	recurrence	grade	differentiated
GSM437093	1	0	2	2
GSM437094	1	0	1	1
GSM437095	1	0	2	2
GSM437096	1	0	1	1
GSM437097	1	0	2	2
GSM437098	1	1	2	2
GSM437099	1	0	1	1
GSM437100	1	0	2	2
GSM437101	1	0	2	2
GSM437102	1	0	2	2
GSM437103	1	0	2	2
GSM437104	1	0	2	2
GSM437105	1	0	2	2
GSM437106	1	0	2	2
GSM437107	1	0	1	1
GSM437108	1	0	2	2
GSM437109	1	0	2	2
GSM437110	1	0	2	2
GSM437111	1	0	2	2
GSM437112	1	0	2	2
GSM437113	1	0	2	2
GSM437114	1	0	2	2
GSM437115	1	0	1	1
GSM437116	1	0	2	2
GSM437117	2	0	2	2
GSM437118	2	0	3	3
GSM437119	2	1	2	2
GSM437120	2	0	2	2
GSM437121	2	1	2	2
GSM437122	2	0	2	2
GSM437123	2	NA	2	2
GSM437124	2	1	2	2
GSM437125	2	0	2	2
GSM437126	2	0	2	2
GSM437127	2	1	3	3
GSM437128	2	0	2	2
GSM437129	2	0	2	2
GSM437130	2	1	2	2
GSM437131	2	0	2	2
GSM437132	2	0	2	2
GSM437133	2	1	1	1
GSM437134	2	0	2	2
GSM437135	2	0	2	2
GSM437136	2	0	2	2
GSM437137	2	0	2	2
GSM437138	2	0	1	1
GSM437139	2	1	2	2
GSM437140	2	0	2	2
GSM437141	2	0	1	1
GSM437142	2	1	3	3
GSM437143	2	1	3	3
GSM437144	2	0	2	2
GSM437145	2	1	2	2
GSM437146	2	0	2	2
GSM437147	2	0	3	3
GSM437148	2	0	2	2
GSM437149	2	0	2	2
GSM437150	2	0	1	1
GSM437151	2	0	2	2
GSM437152	2	0	2	2
GSM437153	2	0	2	2
GSM437154	2	0	2	2
GSM437155	2	0	2	2
GSM437156	2	0	2	2
GSM437157	2	0	3	3
GSM437158	2	0	2	2
GSM437159	2	0	2	2
GSM437160	2	0	2	2
GSM437161	2	0	2	2
GSM437162	2	0	2	2
GSM437163	2	0	2	2
GSM437164	2	0	2	2
GSM437165	2	NA	2	2
GSM437166	2	0	2	2
GSM437167	2	0	2	2
GSM437168	2	0	2	2
GSM437169	2	1	2	2
GSM437170	2	0	2	2
GSM437171	2	0	1	1
GSM437172	2	0	2	2
GSM437173	2	0	2	2
GSM437174	3	1	2	2
GSM437175	3	0	2	2
GSM437176	3	1	2	2
GSM437177	3	1	2	2
GSM437178	3	0	2	2
GSM437179	3	0	2	2
GSM437180	3	1	1	1
GSM437181	3	1	2	2
GSM437182	3	1	2	2
GSM437183	3	1	1	1
GSM437184	3	1	3	3
GSM437185	3	0	1	1
GSM437186	3	0	2	2
GSM437187	3	1	3	3
GSM437188	3	1	2	2
GSM437189	3	1	2	2
GSM437190	3	0	2	2
GSM437191	3	0	2	2
GSM437192	3	0	2	2
GSM437193	3	0	1	1
GSM437194	3	0	2	2
GSM437195	3	0	2	2
GSM437196	3	0	3	3
GSM437197	3	1	2	2
GSM437198	3	0	1	1
GSM437199	3	1	2	2
GSM437200	3	1	2	2
GSM437201	3	1	2	2
GSM437202	3	0	3	3
GSM437203	3	0	3	3
GSM437205	3	0	2	2
GSM437206	3	0	2	2
GSM437207	3	0	2	2
GSM437208	3	0	2	2
GSM437209	3	0	3	3
GSM437210	3	0	2	2
GSM437211	3	1	3	3
GSM437212	3	0	3	3
GSM437213	3	0	3	3
GSM437214	3	1	2	2
GSM437215	3	0	2	2
GSM437216	3	0	3	3
GSM437217	3	0	2	2
GSM437218	3	0	2	2
GSM437219	3	0	2	2
GSM437220	3	0	2	2
GSM437221	3	0	2	2
GSM437222	3	1	2	2
GSM437223	3	1	2	2
GSM437224	3	0	2	2
GSM437225	3	0	2	2
GSM437226	3	0	2	2
GSM437227	3	1	2	2
GSM437228	3	0	2	2
GSM437229	3	0	3	3
GSM437230	3	0	2	2
GSM437231	4	NA	2	2
GSM437232	4	0	2	2
GSM437233	4	NA	1	1
GSM437234	4	NA	2	2
GSM437235	4	NA	3	3
GSM437236	4	NA	2	2
GSM437237	4	NA	2	2
GSM437238	4	0	2	2
GSM437239	4	NA	2	2
GSM437240	4	NA	2	2
GSM437241	4	NA	3	3
GSM437242	4	NA	3	3
GSM437243	4	1	2	2
GSM437244	4	NA	2	2
GSM437245	4	NA	2	2
GSM437246	4	NA	2	2
GSM437247	4	NA	3	3
GSM437248	4	1	3	3
GSM437249	4	0	2	2
GSM437250	4	NA	3	3
GSM437251	4	NA	2	2
GSM437252	4	NA	2	2
GSM437253	4	NA	3	3
GSM437254	4	NA	3	3
GSM437255	4	0	2	2
GSM437256	4	NA	2	2
GSM437257	4	NA	2	2
GSM437258	4	NA	2	2
GSM437259	4	NA	2	2
GSM437260	4	NA	2	2
GSM437261	4	1	2	2
GSM437262	4	NA	2	2
GSM437263	4	NA	2	2
GSM437264	4	0	2	2
GSM437265	4	0	2	2
GSM437266	4	1	3	3
GSM437267	4	NA	3	3
GSM437268	4	NA	2	2
GSM437269	4	NA	2	2
